# Supplementary material for: International registry of congenital porto-systemic shunts: a multi-centre, retrospective and prospective registry of neonates, children and adults with congenital porto-systemic shunts
Source: PubMed Central journal article supplement (PMC9295381; doi:10.1186/s13023-022-02412-8), 2022-07-19
Supplement: 13023_2022_2412_MOESM1_ESM.pdf [file 13023_2022_2412_MOESM1_ESM.pdf]

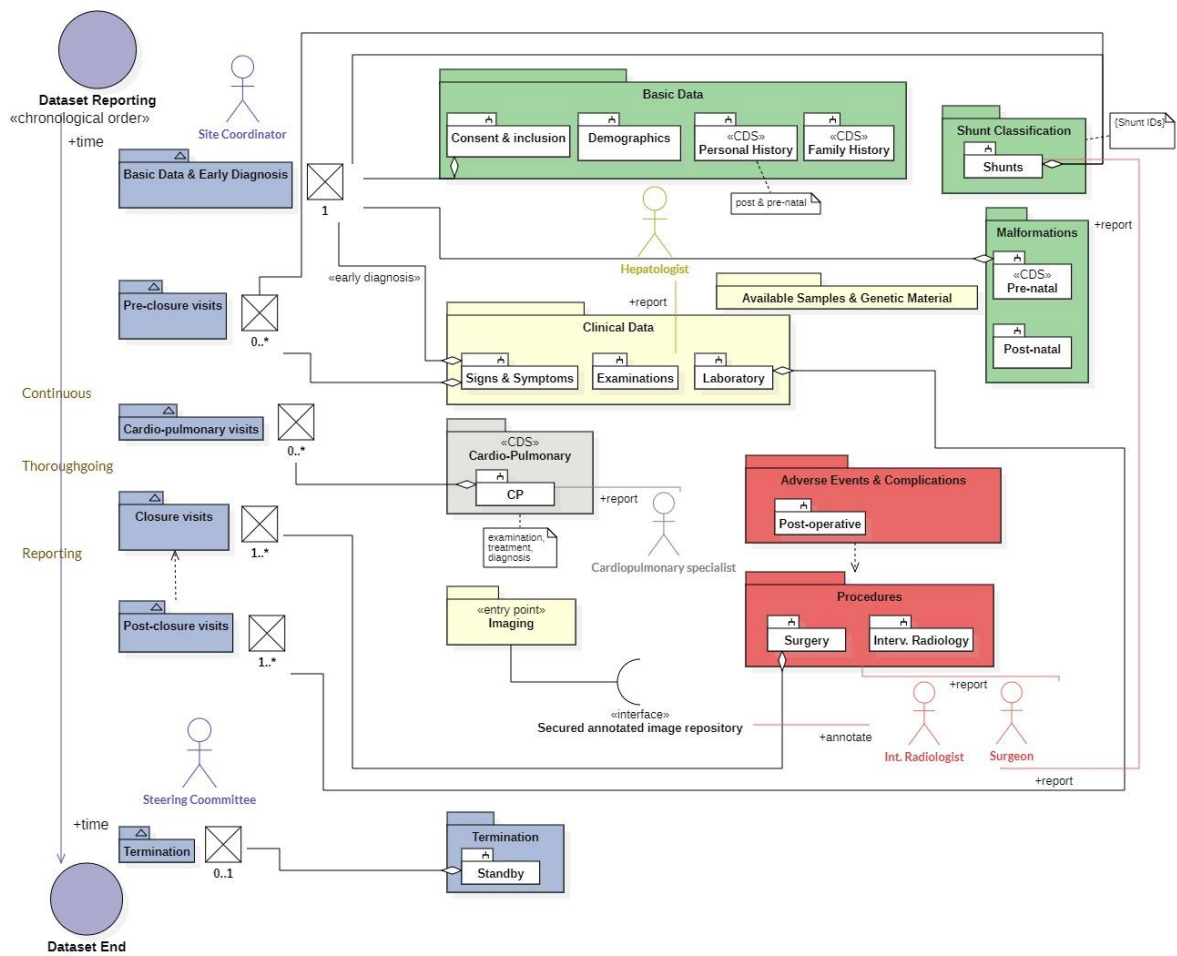

**Supplementary Figure - UML presentation: package/class & use case diagram - relationships:**  
 0..1 no instance or 1 instance, 0..\* zero or more instance, 1..\* at least one instance  
 Purple: visits over time  
 Yellow: clinical forms and imaging  
 Green: specific forms at the Basic Data & Diagnosis visit  
 Red: specific forms at closure  
 Grey: Specific forms at any time-point
